# Supplementary material for: Phylogenetic Determination of Chenopodium quinoaBased on the Chloroplast Genes rbcL and matK
Source: Hindawi journal article supplement (doi:10.1155/2023/6681851), 2023-12-11
Supplement: f1 [file 6681851.f1.docx]

**Supplementary Materials**

**Table S1.** Nucleotide composition of *matK* and *rbcL* chloroplast genes of quinoa accessions from Colombia.

|  | **Nucleotide percentage (%)** | | | | | | | | | | | | | |
| --- | --- | --- | --- | --- | --- | --- | --- | --- | --- | --- | --- | --- | --- | --- |
|  | ***matK*** | | | | | | | ***rcbL*** | | | | | | |
| **Sample** | **T(U)** | **C** | **A** | **G** | **A+T** | **G+C** | **Total** | **T(U)** | **C** | **A** | **G** | **A+T** | **G+C** | **Total** |
| Q1-9 | 36.5 | 18.3 | 30.4 | 14.8 | 66.9 | 33.1 | 480 | 29.1 | 19.7 | 26.9 | 24.3 | 56.0 | 44.0 | 1163 |
| Q2-7 | 36.1 | 18.1 | 29.9 | 15.9 | 66.1 | 33.9 | 509 | 28.1 | 24.4 | 27.3 | 20.2 | 39.3 | 31.6 | 545 |
| Q3-3 | 35.6 | 17.8 | 31.7 | 14.9 | 67.3 | 32.7 | 404 | 29.0 | 19.7 | 26.9 | 24.4 | 55.9 | 44.1 | 1164 |
| Q3-8 | 36.7 | 18.6 | 29.3 | 15.4 | 66.1 | 33.9 | 512 | 29.0 | 19.7 | 26.9 | 24.4 | 55.9 | 44.2 | 1162 |
| Q4-6 | 36.4 | 17.9 | 29.6 | 16.1 | 65.9 | 34.1 | 602 | 29.0 | 19.7 | 26.9 | 24.5 | 55.9 | 44.1 | 1165 |
| Q5-3 | 36.9 | 18.2 | 30.0 | 14.9 | 66.9 | 33.1 | 517 | 29.1 | 19.8 | 26.9 | 24.2 | 56.0 | 44.0 | 1163 |
| Q6-2 | 35.9 | 18.3 | 29.7 | 16.0 | 65.7 | 34.3 | 612 | 29.1 | 19.7 | 26.9 | 24.4 | 55.9 | 44.1 | 1162 |
| Q6-7 | 35.9 | 17.8 | 29.9 | 16.3 | 65.7 | 34.3 | 618 | 29.0 | 19.7 | 26.8 | 24.5 | 55.8 | 44.2 | 1163 |
| Q7-4 | 36.1 | 18.4 | 29.3 | 16.1 | 64.2 | 33.9 | 576 | 29.1 | 19.7 | 26.8 | 24.4 | 55.9 | 44.1 | 1163 |
| Q8-3 | 36.8 | 17.7 | 29.9 | 15.6 | 65.7 | 32.9 | 582 | 29.1 | 19.8 | 26.7 | 24.4 | 55.8 | 44.2 | 1155 |
| Q9-2 | 35.5 | 18.6 | 29.2 | 16.7 | 64.6 | 35.3 | 586 | 28.8 | 19.3 | 27.2 | 24.7 | 41.8 | 32.9 | 518 |
| Q10-6 | 36.4 | 18.0 | 29.6 | 16.0 | 65.7 | 33.8 | 618 | 29.0 | 19.6 | 26.9 | 24.5 | 55.9 | 44.1 | 1168 |
| Q11-4 | 36.3 | 18.2 | 29.3 | 16.3 | 65.0 | 34.2 | 615 | 29.7 | 18.8 | 26.8 | 24.7 | 45.6 | 35.1 | 563 |
| Q12-3 | 36.6 | 17.9 | 29.6 | 15.8 | 65.4 | 33.3 | 614 | 29.1 | 19.7 | 26.9 | 24.4 | 56.0 | 44.0 | 1165 |
| Q13-4 | 36.4 | 18.3 | 29.1 | 16.2 | 65.2 | 34.3 | 618 | 29.0 | 19.7 | 26.9 | 24.4 | 55.9 | 44.2 | 1162 |
| Q14-3 | 35.6 | 18.1 | 29.0 | 17.4 | 60.9 | 33.4 | 587 | 29.0 | 19.7 | 26.9 | 24.4 | 55.9 | 44.1 | 1163 |
| Q15-3 | 35.2 | 18.8 | 29.9 | 16.1 | 64.5 | 34.6 | 616 | 29.0 | 19.7 | 26.9 | 24.4 | 55.9 | 44.1 | 1164 |
| Q16-4 | 36.0 | 18.7 | 29.6 | 15.8 | 64.3 | 33.8 | 609 | 29.1 | 19.7 | 26.8 | 24.4 | 55.9 | 44.1 | 1164 |
| Q17-3 | 36.7 | 18.9 | 28.9 | 15.6 | 64.4 | 33.8 | 610 | 29.1 | 19.7 | 26.9 | 24.4 | 56.0 | 44.0 | 1165 |
| Q18-3 | 36.2 | 18.4 | 29.3 | 16.1 | 64.6 | 33.9 | 610 | 29.0 | 19.7 | 26.9 | 24.4 | 55.9 | 44.2 | 1162 |
| Q19-5 | 29.7 | 15.7 | 36.8 | 17.8 | 66.6 | 33.5 | 562 | 29.0 | 19.7 | 26.9 | 24.4 | 55.9 | 44.2 | 1162 |
| Q20-3 | 36.8 | 18.4 | 28.9 | 15.8 | 65.8 | 34.3 | 619 | 29.0 | 19.7 | 26.9 | 24.4 | 55.9 | 44.2 | 1162 |
| Q21-8 | 34.8 | 19.6 | 29.3 | 16.2 | 63.8 | 35.6 | 617 | 28.2 | 18.9 | 28.7 | 24.2 | 43.1 | 32.7 | 561 |
| Q22-5 | 36.3 | 18.5 | 29.3 | 15.9 | 65.3 | 34.2 | 617 | 29.0 | 19.7 | 26.9 | 24.4 | 55.9 | 44.2 | 1162 |
| Q23-3 | 36.5 | 17.7 | 29.7 | 16.1 | 65.8 | 33.6 | 616 | 29.9 | 18.1 | 28.1 | 23.8 | 43.5 | 31.4 | 558 |
| Q24-6 | 36.3 | 18.0 | 29.6 | 16.1 | 65.3 | 33.9 | 615 | 29.0 | 19.7 | 26.9 | 24.4 | 55.9 | 44.2 | 1162 |
| Q25-3 | 34.4 | 19.2 | 29.6 | 16.8 | 63.3 | 35.6 | 614 | 29.0 | 19.7 | 26.9 | 24.4 | 55.9 | 44.2 | 1162 |
| Q26-3 | 38.1 | 18.6 | 28.0 | 15.3 | 62.0 | 31.7 | 582 | 28.1 | 23.4 | 29.2 | 19.2 | 57.4 | 42.7 | 619 |
| Q27-7 | 35.6 | 19.0 | 29.4 | 16.1 | 64.5 | 34.8 | 616 | 28.0 | 20.3 | 28.4 | 23.4 | 56.4 | 43.6 | 676 |
| Q28-1 | 36.3 | 18.2 | 29.3 | 16.2 | 65.3 | 34.2 | 617 | 29.1 | 19.7 | 26.8 | 24.4 | 55.9 | 44.1 | 1163 |
| Q29-3 | 37.0 | 19.0 | 28.8 | 15.2 | 65.8 | 34.2 | 462 | 29.0 | 19.7 | 26.9 | 24.5 | 55.9 | 44.1 | 1165 |
| Q30-8 | 36.3 | 18.2 | 29.5 | 16.0 | 65.2 | 33.9 | 614 | 29.0 | 19.7 | 26.9 | 24.5 | 55.9 | 44.1 | 1165 |
| Mean | 36.0 | 18.3 | 29.7 | 16.0 | 65.1 | 33.9 | 583 | 29.0 | 19.8 | 27.0 | 24.2 | 53.9 | 42.3 | 1034.9 |
| Min | 29.7 | 15.7 | 28.0 | 14.8 | 60.9 | 31.7 | 404 | 28.0 | 18.1 | 26.7 | 19.2 | 39.3 | 31.4 | 518 |
| Max | 38.1 | 19.6 | 36.8 | 17.8 | 67.3 | 35.6 | 619 | 29.9 | 24.4 | 29.2 | 24.7 | 57.4 | 44.2 | 1168 |
